# Supplementary material for: Expression profiles of circRNAs and the potential diagnostic value of serum circMARK3 in human acute Stanford type A aortic dissection
Source: PubMed Central journal article supplement (PMC6599129; doi:10.1371/journal.pone.0219013), 2019-06-28
Supplement: pone.0219013.s002.pdf [file pone.0219013.s002.pdf]

**S2 Table. Clinical characteristics of 1:1 matched patients, 2:1 matched patients and total patients**

| Characteristics               | 1:1 matched       |                |          | 2:1 matched       |                |          | Total              |                |          |
|-------------------------------|-------------------|----------------|----------|-------------------|----------------|----------|--------------------|----------------|----------|
|                               | Control<br>(n=30) | AAAD<br>(n=30) | <i>P</i> | Control<br>(n=47) | AAAD<br>(n=30) | <i>P</i> | Control<br>(n=172) | AAAD<br>(n=59) | <i>P</i> |
| <b>Age (years)</b>            | 56.1±15.3         | 56.7±12.3      | 0.87     | 57.8±13.2         | 56.7±12.3      | 0.71     | 62.4±11.1          | 52.0±13.2      | <0.0001  |
| <b>Male (%)</b>               | 14 (47%)          | 19 (63%)       | 0.19     | 27(57%)           | 19 (63%)       | 0.64     | 110(64%)           | 43 (73%)       | 0.26     |
| <b>Height (cm)</b>            | 164.8±7.0         | 168.1±6.7      | 0.06     | 165.1±7.2         | 168.1±6.7      | 0.07     | 166.1±8.1          | 168.1±7.2      | 0.09     |
| <b>Weight (kg)</b>            | 66.6±8.6          | 69.6±13.0      | 0.24     | 66.7±9.1          | 69.6±13.0      | 0.25     | 65.5±10.5          | 74.4±16.7      | <0.0001  |
| <b>BMI (kg/m<sup>2</sup>)</b> | 24.4±2.64         | 24.5±3.6       | 0.93     | 24.7±3.2          | 24.5±3.6       | 0.80     | 24.2±3.1           | 25.8±4.7       | 0.0033   |
| <b>Hypertension (n)</b>       | 20 (67%)          | 24(80%)        | 0.38     | 32(68%)           | 24(80%)        | 0.30     | 89(52%)            | 50(85%)        | 0.23     |
| <b>Diabetes mellitus (n)</b>  | 4 (13.3%)         | 1(3.3%)        | 0.35     | 4(8%)             | 1(3.3%)        | 0.64     | 36(21%)            | 1(1.7%)        | 0.0001   |
| <b>Smoking history (n)</b>    | 0 (0%)            | 1 (3.3%)       | 1.00     | 2(4.3%)           | 1 (3.3%)       | 1.00     | 35(20%)            | 9(15%)         | 0.447    |
| <b>Alcoholism (n)</b>         | 6 (20%)           | 5 (16.7%)      | 1.00     | 8(17%)            | 5 (16.7%)      | 1.00     | 21(20%)            | 12(20%)        | 0.133    |
| <b>CKD (n)</b>                | 3 (10%)           | 2 (6.7%)       | 1.00     | 4(8.5%)           | 2 (6.7%)       | 1.00     | 5(2.9%)            | 2(3.4%)        | 1.00     |
| <b>Stroke (n)</b>             | 0 (0%)            | 1 (3.3%)       | 1.00     | 0(0%)             | 1 (3.3%)       | 0.39     | 0(0%)              | 2(3.4%)        | 0.06     |
