# Supplementary material for: Expression profiles of circRNAs and the potential diagnostic value of serum circMARK3 in human acute Stanford type A aortic dissection
Source: PubMed Central journal article supplement (PMC6599129; doi:10.1371/journal.pone.0219013), 2019-06-28
Supplement: pone.0219013.s003.pdf [file pone.0219013.s003.pdf]

**S3 Table. Sample information of RNA used in the RNA-Seq cohort.****Sample Info**

| Well | RIN <sup>c</sup> | Vol. [ul] | Conc. [ng/ul] | Sample Description |
|------|------------------|-----------|---------------|--------------------|
| A0   |                  |           |               |                    |
| A1   | 8.8              | 40        | 293           | CTRL1              |
| B1   | 8.5              | 40        | 265           | CTRL2              |
| C1   | 8.4              | 40        | 290           | CTRL3              |
| D1   | 8.6              | 40        | 277           | CTRL4              |
| E1   | 8.7              | 40        | 269           | CTRL5              |
| F1   | 8.3              | 40        | 267           | CTRL6              |
| G1   | 8.5              | 40        | 269           | CTRL7              |
| H1   | 8.6              | 40        | 262           | CTRL8              |
| A2   | 8.9              | 40        | 281           | CTRL9              |
| B2   | 8.4              | 40        | 279           | CTRL10             |
| C2   | 8.5              | 40        | 256           | AAAD1              |
| D2   | 8.7              | 40        | 273           | AAAD2              |
| E2   | 8.8              | 40        | 298           | AAAD3              |
| F2   | 8.6              | 40        | 257           | AAAD4              |
| G2   | 8.3              | 40        | 271           | AAAD5              |
| H2   | 8.5              | 40        | 286           | AAAD6              |
| A3   | 8.9              | 40        | 287           | AAAD7              |
| B3   | 8.7              | 40        | 285           | AAAD8              |
| D3   | 8.4              | 40        | 281           | AAAD9              |
| E3   | 8.5              | 40        | 257           | AAAD10             |
